# Supplementary material for: The HLA Variant rs6903608 Is Associated with Disease Onset and Relapse of Immune-Mediated Thrombotic Thrombocytopenic Purpura in Caucasians
Source: MDPI journal article supplement (doi:10.3390/jcm9103379), 2020-10-21

**The HLA variant rs6903608 is associated with disease onset and relapse of acquired thrombotic thrombocytopenic purpura in Caucasians**

**Supplemental Material**

**Supplemental Table S1.** Concomitant autoimmune diseases and infectious triggers reported in the enrolled iTTP patients.

| Concomitant autoimmune disease*                         | Number of patients |
|---------------------------------------------------------|--------------------|
| Autoimmune thyroiditis                                  | 13                 |
| Systemic lupus erythematosus                            | 4                  |
| Psoriasis                                               | 2                  |
| Anti-phospholipid syndrome                              | 1                  |
| Discoid lupus erythematosus                             | 1                  |
| Ocular myasthenia                                       | 1                  |
| Immune thrombocytopenia                                 | 1                  |
| Infectious triggers\$                                   | Number of patients |
| Upper respiratory tract infection and flu-like syndrome | 18                 |
| Gastrointestinal infection                              | 7                  |
| Herpes virus infections                                 | 3                  |
| Urinary tract infection                                 | 3                  |
| Lower respiratory tract infection                       | 2                  |
| Soft tissue infection                                   | 2                  |
| Pericarditis                                            | 1                  |
| Acute cholecystitis                                     | 1                  |

\*In four cases a combination of concomitant autoimmune conditions was reported: 1 patient had systemic lupus erythematosus and anti-phospholipid syndrome, 1 patient systemic lupus erythematosus and autoimmune thyroiditis, 1 patient discoid lupus erythematosus and autoimmune thyroiditis and 1 patient had psoriasis and autoimmune thyroiditis.

\$ In two cases a combination of infectious triggers was reported: 2 patients had a Herpes virus infection and an upper respiratory tract infection/flu-like syndrome. In two patients, the type of infection was not detailed by the referring physician.

**Supplemental Table S2. Impact of rituximab on the association between variant rs6903608 and iTTP relapse.** To account for the influence of rituximab on the risk of relapse, we have performed

two additional analyses: 1) Cox regression adjusting also for rituximab use (on the left end of the table); 2) Cox regression after restriction to the 110 patients who were never treated with rituximab, assuming a recessive model of inheritance (50 patients homozygous for the risk allele [CC] versus 60 carriers of the reference allele [CT+TT]) (on the right end of the table).

| Whole cohort (n=153) *    |                          |                          | Patients not treated with rituximab (n=110) |                          |
|---------------------------|--------------------------|--------------------------|---------------------------------------------|--------------------------|
| HR (95% CI)               | HR <sub>1</sub> (95% CI) | HR <sub>2</sub> (95% CI) | HR (95% CI)                                 | HR <sub>1</sub> (95% CI) |
| HR 2.37<br>(1.28 to 4.40) | 2.39<br>(1.29 to 4.44)   | 2.37<br>(1.27 to 4.42)   | 1.97<br>(1.01 to 3.84)                      | 1.95<br>(1.00 to 3.81)   |

\*Five cases had missing data with regards to rituximab use.

HR, unadjusted hazard ratio; HR<sub>1</sub>, adjusted for age at onset; HR<sub>2</sub>, adjusted for rituximab use during the acute and/or remission phase of the first TTP episode.

**Supplemental Figure S1. Schematic representation of the possible scenarios of association between HLA variant rs6903608 and iTTP.** The following three simplified scenarios are represented (Y-axis): (1) rs6903608 increases the risk of a first episode of iTTP but not that of disease relapse; (2) rs6903608 has no effect on a first episode of iTTP but it increases the risk of iTTP relapse; (3) rs6903608 increases the risk of both a first episode of iTTP and relapse. Red (cases) and green (controls) lines depict the risk of having a first episode and a first relapse associated with the variant.

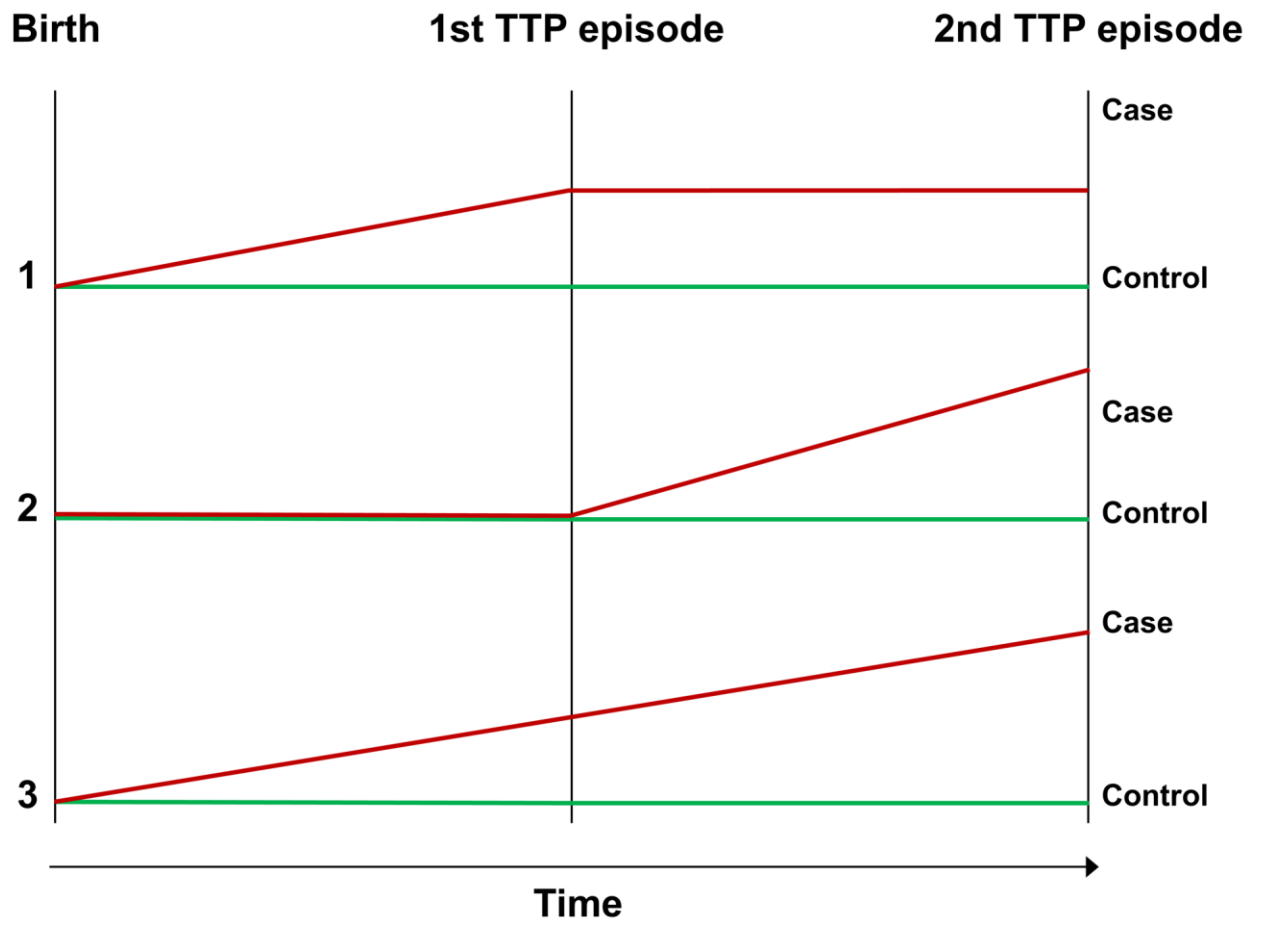

Supplement: s1 [file s1]
